# Supplementary material
Source: bioRxiv or medRxiv preprint supplement (https://www.biorxiv.org/highwire/filestream/35388/field_highwire_adjunct_files/7/120170-2.pdf)

# Quality control - CRISPRa library

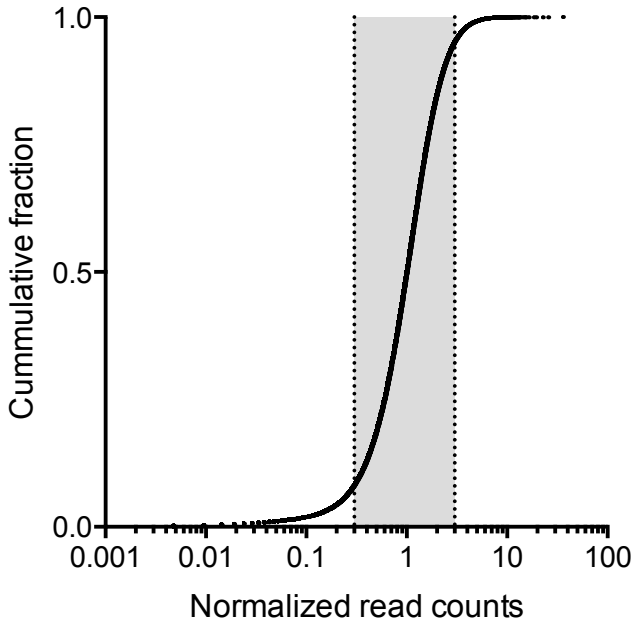

Supplement: Supplementary file [file 120170-2.pdf]
